# Supplementary material
Source: PubMed Central journal article supplement (PMC4679425)
Supplement: NIHMS723677-supplement-04.pdf [file NIHMS723677-supplement-04.pdf]

**Figure 1.** Chromatograms of drug-free human serum spiked with analytes and internal standards. Chromatograms represent a 100 ng/mL drug mixture. The selected transition is indicated for each chromatogram and elution times are indicated above each peak.

**Figure 2.** Deming regression analysis of drug-free human serum spiked with morphine (A), morphine-6- $\beta$ -glucuronide (B), morphine-3- $\beta$ -glucuronide (C), and hydromorphone (D) comparing the described method (HPLC-MS/MS Vantage) to NMS Labs UPLC-MS/MS method. Slope, intercept, and Pearson's coefficient (R) are indicated for each analyte.

**Figure S1.** Chromatograms of drug-free human serum spiked with the 48-component interference mixture (does not contain hydromorphone-3- $\beta$ -glucuronide) and extracted with IS spiked methanol. At retention times of interest, there are no interferences.

**Figure S2.** Stacked chromatogram plot of drug-free serum spiked with morphine-3- $\beta$ -glucuronide, hydromorphone-3- $\beta$ -glucuronide, and morphine-6- $\beta$ -glucuronide at equimolar concentrations. The peak overlap of hydromorphone-3- $\beta$ -glucuronide and morphine-6- $\beta$ -glucuronide interferes with morphine-6- $\beta$ -glucuronide integration on average 75%.
